CORRECTION

## Correction: Derivation and validation of an algorithm to predict transitions from community to residential long-term care among persons with dementia—A retrospective cohort study

Wenshan Li, Luke Turcotte, Amy T. Hsu, Robert Talarico, Danial Qureshi, Colleen Webber, Steven Hawken, Peter Tanuseputro, Douglas G. Manuel, Greg Huyer

There is an error in affiliation 2 for author Luke Turcotte. The correct affiliation 2 is: Brock University, Department of Health Sciences, St. Catherines, Ontario, Canada.

### Reference

1. Li W, Turcotte L, Hsu AT, Talarico R, Qureshi D, Webber C, et al. Derivation and validation of an algorithm to predict transitions from community to residential long-term care among persons with dementia—A retrospective cohort study. PLOS Digit Health. 2024;3(10):e0000441. <https://doi.org/10.1371/journal.pdig.0000441> PMID: [39423179](https://pubmed.ncbi.nlm.nih.gov/39423179/)

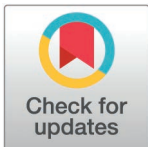

### OPEN ACCESS

**Citation:** Li W, Turcotte L, Hsu AT, Talarico R, Qureshi D, Webber C, et al. (2025) Correction: Derivation and validation of an algorithm to predict transitions from community to residential long-term care among persons with dementia—A retrospective cohort study. PLOS Digit Health 4(8): e0000987. <https://doi.org/10.1371/journal.pdig.0000987>

**Published:** August 13, 2025

**Copyright:** © 2025 Li et al. This is an open access article distributed under the terms of the [Creative Commons Attribution License](https://creativecommons.org/licenses/by/4.0/), which permits unrestricted use, distribution, and reproduction in any medium, provided the original author and source are credited.
